# Supplementary material
Source: PubMed Central journal article supplement (PMC6070433)
Supplement: NIHMS925894-supplement-supplement_1.pdf [file NIHMS925894-supplement-supplement_1.pdf]

Table 4 (online only): Multivariable <sup>a</sup> relative risks for cumulative updated diet quality scores for hip fractures stratified by BMI in the Nurses' Health Study (n=74,446, postmenopausal) and Health Professionals Follow-up Study (n=36,602, age 50+) participants <sup>b</sup>.

|                               | Q1 | Q2                | Q3                | Q4                 | Q5                | P trend | P interaction |
|-------------------------------|----|-------------------|-------------------|--------------------|-------------------|---------|---------------|
| <b>aMed <sup>c</sup></b>      |    |                   |                   |                    |                   |         |               |
| WOMEN                         |    |                   |                   |                    |                   |         |               |
| BMI < 25.0                    | 1  | 1.15 (0.96, 1.38) | 0.94 (0.78, 1.13) | 1.00 (0.82, 1.21)  | 0.98 (0.80, 1.21) | 0.31    | 0.38          |
| BMI ≥ 25.0                    | 1  | 0.89 (0.71, 1.10) | 1.04 (0.83, 1.29) | 0.76 (0.60, 0.97)  | 0.91 (0.70, 1.18) | 0.11    |               |
| MEN                           |    |                   |                   |                    |                   |         |               |
| BMI < 25.0                    | 1  | 1.26 (0.84, 1.89) | 0.99 (0.65, 1.50) | 0.97 (0.64, 1.48)  | 0.89 (0.58, 1.38) | 0.28    | 0.03          |
| BMI ≥ 25.0                    | 1  | 0.89 (0.60, 1.33) | 1.01 (0.69, 1.49) | 0.83 (0.54, 1.27)  | 0.99 (0.63, 1.58) | 0.85    |               |
| <b>AHEI-2010 <sup>d</sup></b> |    |                   |                   |                    |                   |         |               |
| WOMEN                         |    |                   |                   |                    |                   |         |               |
| BMI < 25.0                    | 1  | 1.08 (0.91, 1.27) | 1.01 (0.85, 1.20) | 0.95 (0.79, 1.13)  | 0.91 (0.76, 1.09) | 0.08    | 0.39          |
| BMI ≥ 25.0                    | 1  | 0.93 (0.76, 1.14) | 1.03 (0.84, 1.26) | 0.91 (0.73, 1.12)  | 0.81 (0.64, 1.03) | 0.11    |               |
| MEN                           |    |                   |                   |                    |                   |         |               |
| BMI < 25.0                    | 1  | 1.06 (0.71, 1.59) | 1.05 (0.70, 1.57) | 0.84 (0.55, 1.127) | 1.01 (0.68, 1.50) | 0.61    | 0.01          |

---

|             |   |                   |                   |                   |                   |      |
|-------------|---|-------------------|-------------------|-------------------|-------------------|------|
| BMI >= 25.0 | 1 | 0.76 (0.51, 1.12) | 0.85 (0.58, 1.26) | 0.85 (0.57, 1.25) | 0.65 (0.42, 1.11) | 0.17 |
|-------------|---|-------------------|-------------------|-------------------|-------------------|------|

**DASH<sup>e</sup>**

WOMEN

|             |   |                   |                   |                   |                   |      |      |
|-------------|---|-------------------|-------------------|-------------------|-------------------|------|------|
| BMI < 25.0  | 1 | 1.15 (0.95, 1.39) | 1.10 (0.91, 1.34) | 0.96 (0.79, 1.17) | 0.93 (0.76, 1.14) | 0.06 | 0.68 |
| BMI >= 25.0 | 1 | 1.20 (0.96, 1.51) | 1.06 (0.84, 1.35) | 0.96 (0.76, 1.23) | 0.95 (0.74, 1.24) | 0.22 |      |

MEN

|             |   |                   |                   |                   |                   |      |      |
|-------------|---|-------------------|-------------------|-------------------|-------------------|------|------|
| BMI < 25.0  | 1 | 1.27 (0.84, 1.93) | 1.07 (0.69, 1.65) | 0.97 (0.63, 1.50) | 0.84 (0.54, 1.29) | 0.09 | 0.03 |
| BMI >= 25.0 | 1 | 0.93 (0.62, 1.38) | 0.89 (0.59, 1.35) | 0.85 (0.56, 1.30) | 1.23 (0.80, 1.89) | 0.64 |      |

---

<sup>a</sup> adjusted for age, energy intake, BMI, height, smoking, leisure-time physical activity, post menopausal hormone use (women), thiazides, lasix, anti-inflammatory steroids, multivitamin supplements, supplemental intakes of calcium, retinol, and vitamin D, intake of caffeine, sugar sweetened beverages (aMed only), and alcohol (DASH only), history of diabetes.

<sup>b</sup> NHS : BMI<25 → 1310 cases, BMI>=25 → 803 cases (except for AHEI due to 1984 start of follow-up: BMI<25 → 1453 cases; BMI>=25 → 893 cases)

HPFS: BMI<25 → 327 cases; BMI>=25 → 276 cases

<sup>c</sup> Alternate Mediterranean Diet Score

<sup>d</sup> Alternate Healthy Eating Index-2010

<sup>e</sup> Dietary Approaches to Stop Hypertension Score

Table 5 (online only): Multivariable <sup>a</sup> relative risks for cumulative updated diet quality scores for hip fractures stratified by physical activity level in the Nurses' Health Study (n=74,446, postmenopausal) and Health Professionals Follow-up Study (n=36,602, age 50+) participants <sup>b</sup>.

|                               | Q1 | Q2                | Q3                | Q4                | Q5                | P trend | P interaction |
|-------------------------------|----|-------------------|-------------------|-------------------|-------------------|---------|---------------|
| <b>aMed <sup>c</sup></b>      |    |                   |                   |                   |                   |         |               |
| WOMEN                         |    |                   |                   |                   |                   |         |               |
| METs <sup>d</sup> ≤ median    | 1  | 1.00 (0.85, 1.19) | 0.92 (0.77, 1.10) | 0.78 (0.64, 0.96) | 0.92 (0.74, 1.15) | 0.05    | 0.83          |
| METs > median                 | 1  | 1.11 (0.87, 1.40) | 1.05 (0.83, 1.33) | 0.99 (0.78, 1.26) | 0.95 (0.74, 1.22) | 0.08    |               |
| MEN                           |    |                   |                   |                   |                   |         |               |
| METs ≤ median                 | 1  | 1.20 (0.86, 1.68) | 1.08 (0.77, 1.52) | 0.89 (0.62, 1.28) | 0.91 (0.61, 1.34) | 0.26    | 0.21          |
| METs > median                 | 1  | 0.72 (0.43, 1.21) | 0.81 (0.49, 1.32) | 0.79 (0.48, 1.30) | 0.81 (0.49, 1.36) | 0.79    |               |
| <b>AHEI-2010 <sup>e</sup></b> |    |                   |                   |                   |                   |         |               |
| WOMEN                         |    |                   |                   |                   |                   |         |               |
| METs ≤ median                 | 1  | 1.00 (0.85, 1.17) | 0.94 (0.79, 1.10) | 0.89 (0.75, 1.06) | 0.83 (0.68, 1.01) | 0.02    | 0.62          |
| METs > median                 | 1  | 0.95 (0.77, 1.18) | 1.02 (0.83, 1.26) | 0.90 (0.73, 1.11) | 0.83 (0.67, 1.02) | 0.03    |               |
| MEN                           |    |                   |                   |                   |                   |         |               |
| METs ≤ median                 | 1  | 0.79 (0.56, 1.11) | 0.98 (0.70, 1.36) | 0.78 (0.55, 1.11) | 0.82 (0.58, 1.17) | 0.24    | 0.15          |

---

|               |   |                   |                   |                   |                   |      |  |
|---------------|---|-------------------|-------------------|-------------------|-------------------|------|--|
| METs > median | 1 | 0.91 (0.56, 1.48) | 0.73 (0.44, 1.20) | 0.77 (0.48, 1.24) | 0.75 (0.47, 1.20) | 0.22 |  |
|---------------|---|-------------------|-------------------|-------------------|-------------------|------|--|

**DASH<sup>f</sup>**

WOMEN

|               |   |                   |                   |                   |                   |      |      |
|---------------|---|-------------------|-------------------|-------------------|-------------------|------|------|
| METs ≤ median | 1 | 1.16 (0.97, 1.39) | 1.03 (0.86, 1.24) | 0.99 (0.81, 1.20) | 0.88 (0.71, 1.10) | 0.09 | 0.88 |
| METs > median | 1 | 1.11 (0.87, 1.43) | 1.09 (0.85, 1.39) | 0.88 (0.69, 1.13) | 0.88 (0.69, 1.13) | 0.01 |      |

MEN

|               |   |                   |                   |                   |                   |      |      |
|---------------|---|-------------------|-------------------|-------------------|-------------------|------|------|
| METs ≤ median | 1 | 0.93 (0.66, 1.31) | 0.96 (0.68, 1.36) | 0.83 (0.64, 1.20) | 0.86 (0.59, 1.24) | 0.29 | 0.14 |
| METs > median | 1 | 1.11 (0.66, 1.88) | 0.83 (0.48, 1.43) | 0.82 (0.48, 1.38) | 0.92 (0.54, 1.55) | 0.31 |      |

---

<sup>a</sup> adjusted for age, energy intake, BMI, height, smoking, leisure-time physical activity, post menopausal hormone use (women), thiazides, lasix, anti-inflammatory steroids, multivitamin supplements, supplemental intakes of calcium, retinol, and vitamin D, intake of caffeine, sugar sweetened beverages (aMed only), and alcohol (DASH only), history of diabetes.

<sup>b</sup> NHS : MET ≤ median → 1162 cases, METs > median → 981 cases (except for AHEI due to 1984 start of follow-up: MET ≤ median → 1289 cases; METs > median → 1096 cases) HPFS: MET ≤ median → 381 cases; METs > median → 222 cases

<sup>c</sup> Alternate Mediterranean Diet Score

<sup>d</sup> Metabolic equivalent hours/wk, median values for leisure-time physical activity are specific for each questionnaire cycle and range from 7.7-12.4 METs in women and from 10.6-30.5 in men.

<sup>e</sup> Alternate Healthy Eating Index-2010

<sup>f</sup> Dietary Approaches to Stop Hypertension Score

Table 6 (online only) Relative risks (95% CI) for quintiles of current diet scores for hip fractures in the Nurses' Health Study (n=74,446, postmenopausal) and Health Professionals Follow-up Study (n=36,602, age 50+) participants

|                                     | Q1  | Q2                | Q3                | Q4                | Q5                | P trend |
|-------------------------------------|-----|-------------------|-------------------|-------------------|-------------------|---------|
| <b>AHEI-2010<sup>a</sup></b>        |     |                   |                   |                   |                   |         |
| <i>Women</i>                        |     |                   |                   |                   |                   |         |
| No. of cases                        | 554 | 500               | 496               | 452               | 428               |         |
| Age & energy adjusted               | 1   | 0.84 (0.74, 0.95) | 0.83 (0.73, 0.94) | 0.77 (0.68, 0.87) | 0.73 (0.64, 0.83) | <0.001  |
| Multivariable <sup>b</sup> adjusted | 1   | 0.91 (0.80, 1.03) | 0.92 (0.81, 1.04) | 0.87 (0.76, 0.99) | 0.82 (0.71, 0.93) | 0.001   |
| <i>Men</i>                          |     |                   |                   |                   |                   |         |
| No. of cases                        | 133 | 131               | 122               | 109               | 132               |         |
| Age & energy adjusted               | 1   | 0.88 (0.69, 1.13) | 0.80 (0.62, 1.03) | 0.72 (0.56, 0.93) | 0.81 (0.63, 1.04) | 0.01    |
| Multivariable <sup>b</sup> adjusted | 1   | 0.92 (0.71, 1.18) | 0.84 (0.65, 1.09) | 0.76 (0.59, 1.00) | 0.85 (0.65, 1.10) | 0.03    |
| <b>DASH<sup>c</sup></b>             |     |                   |                   |                   |                   |         |
| <i>Women</i>                        |     |                   |                   |                   |                   |         |
| No. of cases                        | 543 | 488               | 584               | 435               | 505               |         |

|                       |   |                   |                   |                   |                   |        |
|-----------------------|---|-------------------|-------------------|-------------------|-------------------|--------|
| Age & energy adjusted | 1 | 0.89 (0.79, 1.00) | 0.85 (0.75, 0.95) | 0.71 (0.63, 0.81) | 0.71 (0.63, 0.81) | <0.001 |
|-----------------------|---|-------------------|-------------------|-------------------|-------------------|--------|

|                                     |   |                   |                   |                   |                   |       |
|-------------------------------------|---|-------------------|-------------------|-------------------|-------------------|-------|
| Multivariable <sup>b</sup> adjusted | 1 | 0.96 (0.85, 1.09) | 0.93 (0.82, 1.05) | 0.80 (0.70, 0.92) | 0.79 (0.69, 0.90) | 0.001 |
|-------------------------------------|---|-------------------|-------------------|-------------------|-------------------|-------|

*Men*

|              |     |     |     |     |     |
|--------------|-----|-----|-----|-----|-----|
| No. of cases | 116 | 118 | 133 | 113 | 147 |
|--------------|-----|-----|-----|-----|-----|

|                       |   |                   |                   |                   |                   |      |
|-----------------------|---|-------------------|-------------------|-------------------|-------------------|------|
| Age & energy adjusted | 1 | 0.85 (0.65, 1.10) | 0.89 (0.69, 1.15) | 0.76 (0.59, 1.01) | 0.82 (0.63, 1.05) | 0.08 |
|-----------------------|---|-------------------|-------------------|-------------------|-------------------|------|

|                                     |   |                   |                   |                   |                   |      |
|-------------------------------------|---|-------------------|-------------------|-------------------|-------------------|------|
| Multivariable <sup>b</sup> adjusted | 1 | 0.88 (0.67, 1.15) | 0.92 (0.71, 1.20) | 0.81 (0.61, 1.06) | 0.83 (0.63, 1.08) | 0.11 |
|-------------------------------------|---|-------------------|-------------------|-------------------|-------------------|------|

**aMed<sup>d</sup>**

*Women*

|              |     |     |     |     |     |
|--------------|-----|-----|-----|-----|-----|
| No. of cases | 540 | 569 | 517 | 457 | 472 |
|--------------|-----|-----|-----|-----|-----|

|                       |   |                   |                   |                   |                   |        |
|-----------------------|---|-------------------|-------------------|-------------------|-------------------|--------|
| Age & energy adjusted | 1 | 0.91 (0.80, 1.03) | 0.83 (0.73, 0.93) | 0.80 (0.70, 0.91) | 0.73 (0.64, 0.84) | <0.001 |
|-----------------------|---|-------------------|-------------------|-------------------|-------------------|--------|

|                                     |   |                   |                   |                   |                   |       |
|-------------------------------------|---|-------------------|-------------------|-------------------|-------------------|-------|
| Multivariable <sup>b</sup> adjusted | 1 | 0.95 (0.84, 1.08) | 0.90 (0.80, 1.02) | 0.90 (0.79, 1.03) | 0.83 (0.72, 0.96) | 0.002 |
|-------------------------------------|---|-------------------|-------------------|-------------------|-------------------|-------|

*Men*

|              |     |     |     |     |     |
|--------------|-----|-----|-----|-----|-----|
| No. of cases | 130 | 105 | 129 | 153 | 110 |
|--------------|-----|-----|-----|-----|-----|

|                                     |   |                   |                   |                   |                   |      |
|-------------------------------------|---|-------------------|-------------------|-------------------|-------------------|------|
| Age & energy adjusted               | 1 | 0.82 (0.63, 1.07) | 0.81 (0.63, 1.05) | 0.88 (0.68, 1.13) | 0.76 (0.58, 1.00) | 0.07 |
| Multivariable <sup>b</sup> adjusted | 1 | 0.84 (0.64, 1.10) | 0.85 (0.66, 1.11) | 0.94 (0.73, 1.21) | 0.82 (0.62, 1.09) | 0.25 |

---

<sup>a</sup> Alternative Healthy Eating Index-2010

<sup>b</sup> adjusted for age, energy intake, BMI, height, smoking, leisure-time physical activity, post menopausal hormone use (women), thiazides, lasix, anti-inflammatory steroids, multivitamin supplements, supplemental intakes of calcium, retinol, and vitamin D, intake of caffeine, sugar sweetened beverages (Alternate Mediterranean Diet Score only), and alcohol (Dietary Approaches to Stop Hypertension Score only), history of diabetes.

<sup>c</sup> Dietary Approaches to Stop Hypertension score

<sup>d</sup> Alternate Mediterranean Diet score

Table 7 (online only): Multivariable relative risk (RR) (95% CI) of categories of cumulative diet scores for hip fractures in the Nurses' Health Study (n=74,446, postmenopausal) and Health Professionals Follow-up Study (n=36,602, age 50+) participants

|                                     | Score categories (points) |                   |                   |                   |                   |                  |
|-------------------------------------|---------------------------|-------------------|-------------------|-------------------|-------------------|------------------|
| <b>AHEI-2010<sup>a</sup></b>        | ≤40                       | 41-48             | 49-56             | 57-64             | 65+               | <b>P trend</b>   |
| <i>Women</i>                        |                           |                   |                   |                   |                   |                  |
| No. of cases                        | 205                       | 546               | 807               | 539               | 288               |                  |
| Age & energy adjusted               | 1                         | 0.94 (0.80, 1.10) | 0.91 (0.78, 1.10) | 0.76 (0.64, 0.89) | 0.73 (0.61, 0.88) | <b>&lt;0.001</b> |
| Multivariable <sup>b</sup> adjusted | 1                         | 1.01 (0.86, 1.19) | 1.04 (0.89, 1.22) | 0.90 (0.76, 1.06) | 0.85 (0.70, 1.03) | <b>0.02</b>      |
| <i>Men</i>                          |                           |                   |                   |                   |                   |                  |
| No. of cases                        | 49                        | 96                | 184               | 148               | 126               |                  |
| Age & energy adjusted               | 1                         | 0.65 (0.46, 0.92) | 0.76 (0.55, 1.06) | 0.62 (0.45, 0.87) | 0.68 (0.48, 0.95) | <b>0.22</b>      |
| Multivariable <sup>b</sup> adjusted | 1                         | 0.68 (0.47, 0.97) | 0.80 (0.57, 1.11) | 0.67 (0.47, 0.94) | 0.71 (0.50, 1.01) | <b>0.34</b>      |
| <b>DASH<sup>c</sup></b>             |                           |                   |                   |                   |                   |                  |
|                                     | ≤20                       | 21-23             | 24-26             | 27-29             | 30+               |                  |
| <i>Women</i>                        |                           |                   |                   |                   |                   |                  |
| No. of cases                        | 336                       | 566               | 609               | 448               | 184               |                  |
| Age & energy adjusted               | 1                         | 1.08 (0.94, 1.23) | 0.92 (0.80, 1.05) | 0.88 (0.75, 1.01) | 0.75 (0.62, 0.90) | <b>&lt;0.001</b> |
| Multivariable <sup>b</sup> adjusted | 1                         | 1.17 (1.02, 1.34) | 1.06 (0.92, 1.22) | 1.02 (0.88, 1.19) | 0.87 (0.71, 1.05) | <b>0.03</b>      |
| <i>Men</i>                          |                           |                   |                   |                   |                   |                  |
| No. of cases                        | 106                       | 124               | 152               | 115               | 106               |                  |
| Age & energy adjusted               | 1                         | 0.93 (0.71, 1.22) | 0.96 (0.74, 1.24) | 0.87 (0.66, 1.15) | 0.97 (0.73, 1.30) | <b>0.52</b>      |
| Multivariable <sup>b</sup> adjusted | 1                         | 0.96 (0.73, 1.25) | 0.98 (0.75, 1.28) | 0.90 (0.68, 1.20) | 0.96(0.70, 1.30)  | <b>0.50</b>      |

| <b>aMed</b> <sup>d</sup>            | 0-2 | 3                 | 4                 | 5                 | 6                 | 7-9               |        |
|-------------------------------------|-----|-------------------|-------------------|-------------------|-------------------|-------------------|--------|
| <i>Women</i>                        |     |                   |                   |                   |                   |                   |        |
| No. of cases                        | 259 | 445               | 549               | 452               | 314               | 124               |        |
| Age & energy adjusted               | 1   | 0.99 (0.84, 1.15) | 0.92 (0.79, 1.07) | 0.80 (0.68, 0.93) | 0.84 (0.71, 1.00) | 0.72 (0.57, 0.89) | <0.001 |
| Multivariable <sup>b</sup> adjusted | 1   | 1.03 (0.88, 1.20) | 1.02 (0.88, 1.19) | 0.92 (0.78, 1.08) | 0.98 (0.82, 1.18) | 0.85 (0.68, 1.07) | 0.08   |
| <i>Men</i>                          |     |                   |                   |                   |                   |                   |        |
| No. of cases                        | 63  | 99                | 149               | 124               | 91                | 77                |        |
| Age & energy adjusted               | 1   | 1.00 (0.72, 1.38) | 1.13 (0.84, 1.53) | 0.88 (0.64, 1.21) | 0.86 (0.61, 1.21) | 1.06 (0.74, 1.50) | 0.78   |
| Multivariable <sup>b</sup> adjusted | 1   | 1.04 (0.75, 1.43) | 1.20 (0.88, 1.63) | 0.94 (0.68, 1.30) | 0.92 (0.65, 1.31) | 1.12 (0.77, 1.63) | 0.56   |

<sup>a</sup> Alternate Healthy Eating Index score, higher score represents a healthier diet.

<sup>b</sup> adjusted for age, energy intake, BMI, height, smoking, leisure-time physical activity, post menopausal hormone use (women), thiazides, lasix, anti-inflammatory steroids, multivitamin supplements, supplemental intakes of calcium, retinol, and vitamin D, intake of caffeine, sugar sweetened beverages (Alternate Mediterranean Diet Score only), and alcohol (Dietary Approaches to Stop Hypertension Score only), history of diabetes.

<sup>c</sup> Dietary Approaches to Stop Hypertension score, higher score presents better adherence.

<sup>d</sup> Alternate Mediterranean Diet score, higher score presents better adherence.
